# Supplementary material
Source: PubMed Central journal article supplement (PMC4409289)

## Supplemental materials and methods

### *Generation of mice heterozygous for the floxed SS allele*

A conditional targeting vector of a replacement type was produced by inserting one loxP site into a BamHI site in intron 5' to exon 5 and a neomycin selection cassette along with the second loxP site into an EcoRV site in 3' to exon 5 as previously described(1) (Supplemental figure 1). The transcriptional orientation of the *neo* gene was opposite to that of the SS gene. Excision of sequences between the loxP sites by Cre recombinase deletes exons 5, which includes the catalytic site of SS. We independently electroporated JH1 ES cells (A gift from Dr. J. Herz) with the targeting vector. Recombinant clones exhibiting a single allele containing a floxed SS gene were identified by PCR using primers P1 (5'-ATACAGGGGAGTGTGCCTTTCTTGTG-3') and P2 (5'-GATTGGGAAGACAATAGCAGGCATGC -3'). All targeted clones were confirmed by Southern blot analysis using a cDNA probe containing intron 3. The targeted clones were injected into the C57BL/6J blastocysts, yielding 2 lines of chimeric mice which transmitted the floxed allele through the germ line.

### *Generation of liver-specific SS knock-out mice*

Mice expressing Cre recombinase under the control of the albumin gene promoter (Alb-Cre) (2) were backcrossed with C57BL/6J mice more than 6 times before interbreeding.  $SS^{+/f}$  (f denotes flanked by loxP) carrying one copy of the Alb-Cre transgene were interbred with  $SS^{+/f}$  littermates lacking Cre to generate liver-specific SS knock-out ( $SS^{f/f}$  Alb-Cre; L-SSKO) mice and littermate control [ $SS^{f/f}$  (fSS),  $SS^{+/+}$  Alb-Cre, and  $SS^{+/+}$  (WT)] mice. Age- and sex-matched littermates were used as the controls. Disruption of the floxed SS allele in the mice was confirmed by Southern blot and Northern blot analyses. Genotyping was performed by PCR using genomic DNA isolated from the tail tip. The primer sequences for the Alb-Cre transgenes were as follows: primer A, 5'GTGGTTAATGATCTACAG 3'; primer B 5'CCTGAACATGTCCATCAG 3'. For floxed SS genotyping, we used as primer A, 5'TTGACTGTCAGCAGCATGTC 3'; and primer B, 5'TGCCATCACCTTCATTGCAC 3'. All mice were group-housed in cages with a 12-hour light/dark cycle and fed CE-2 (Japan CLEA) which contained 1.0% crude carbohydrate, 24.9% crude protein and 4.6% crude fat. Unless otherwise stated, they fed a chow diet *ad libitum*, and tissues were collected in the early dark phase at a time when cholesterol biosynthesis activity is at its peak of diurnal rhythm(3). All animal experiments were performed with the approval of the Institutional Animal Care and Research Advisory Committee at Jichi Medical University and University of Tokyo.

### ***Northern blot analysis and Quantitative real-time PCR***

Total RNA was prepared from mouse tissues using TRIzol (Invitrogen). For Northern blot analysis, pooled total RNA was subjected to 1% agarose gel electrophoresis in the presence of formalin and transferred to Hybond N<sup>+</sup> membranes (GE healthcare). The membranes were hybridized to <sup>32</sup>P-labeled SS cDNA probes. Radioactivity was quantified with BAS 2000 (Fujifilm).

For Quantitative real-time PCR, all reactions were done in triplicate and the relative amounts of mRNAs were calculated using the standard curve method or comparative CT method with the 7300 Real-Time PCR system (Applied Biosystems) according to the manufacturer's protocol. Mouse glyceraldehyde 3-phosphate dehydrogenase (GAPDH) or  $\beta$  actin mRNA was used as the invariant control.

The primer-probe sets for real-time PCR was shown in Supplemental table 1.

### ***Immunoblot analyses***

To prepare membrane and cytosol fractions for immunoblot analyses, aliquots of frozen liver (~100 mg) were homogenized in 1 ml buffer (20 mM TrisHCl at pH 7.4, 2 mM MgCl<sub>2</sub>, 0.25M sucrose, 10 mM sodium EDTA and 10 mM sodium EGTA) supplemented with protease

inhibitor cocktail (Sigma). The liver homogenate was centrifuged at  $1,000 \times g$  for 5 minutes at  $4^{\circ}\text{C}$ . The supernatant was removed and used to prepare a membrane and cytosol fraction as previously described(4).

After aliquots of the membrane fraction were removed for measuring protein concentration with the BCA Kit (Pierce Biotechnology), the remainder of each sample was mixed with 4 $\times$  SDS loading buffer (12% (w/v) SDS, 0.02% bromophenol blue, 30% glycerol, 0.15 M Tris-HCl at pH 6.8, and 6%  $\beta$ -mercaptoethanol). Protein from the livers of mice (45  $\mu\text{g}$ ) was subjected to SDS-PAGE and immunoblot analysis. For immunoblot analysis of apolipoprotein (apo) B, 2  $\mu\text{l}$  of plasma were delipidated and subjected to SDS-PAGE. Rabbit polyclonal antibody for mouse HMGCR was provided by Dr. YK Ho, MS Brown and JL Goldstein(5). Additional antibodies are as follows: SS (S10120, BD bioscience), protein disulfide isomerase (PDI) (SPA-891, Stressgen), apoB (SC-11795, Santa Cruz Biotechnology), LDLR (AF2255, R and D Systems) and SR-BI (NB400-104SS, Novus biologicals)

#### *Assays of SS and HMGCR activity*

Liver were homogenized in a buffer containing 15 mM nicotinamide, 2 mM MgCl<sub>2</sub>, and 100 mM potassium phosphate, pH 7.4, and centrifuged at 10,000 × g for 20 minutes at 4 °C. The supernatants were centrifuged at 105,000 × g for 1 hour at 4 °C, and the resultant pellets, comprising a microsomal fraction, were washed, resuspended in the same buffer, and stored in aliquots at -80 °C. SS and HMGCR activities were measured as described previously(6, 7) with slight modifications with respect to use of thin-layer chromatography (TLC) to separate [<sup>3</sup>H] squalene(8).

#### *Lipids and biochemical analysis*

Blood was drawn from the retro-orbital sinus. Plasma was separated immediately and stored at –80°C. Plasma lipids, lipoproteins and ALT were measured as previously described(7). Hepatic squalene content was determined by the HPLC method at the TORAY Research Center (Tokyo, Japan). Hepatic mevalonate content was determined by the HMGCR enzymatic cycling assay at the Asahi Kasei Pharma Corporation (Shizuoka, Japan)(9). Hepatic FPP was determined by LC-MS/MS as previously described(10). Hepatic sterol intermediates and oxysterols were determined by LC-MS/MS as previously described(11)

#### *Measurement of hepatic lipids synthesis in vitro using liver slices*

Hepatic lipids synthesis *in vitro* using liver slices was measured as previously described(7). Non-saponifiable farnesol from livers were separated by TLC with diethyl ether/ hexane/ chloroform/ acetic acid (550:400:50:1, vol/vol) (8).

#### ***Measurement of hepatic cholesterol synthesis in vivo***

Mice were fed *ad libitum* a regular chow diet prior to the experiment. At the early dark cycle, the mice were anesthetized and intravenously injected with 0.9% saline containing  $^3\text{H}$  water via jugular vein. The amount of  $^3\text{H}$  water was 4 mCi/100g body weight(12). One hour later the livers were removed for measurement of  $^3\text{H}$ -labeled digitonin-precipitable sterols as previously described(13)

#### ***Measurement of intestinal cholesterol absorption***

Intestinal cholesterol absorption was measured by a fecal isotope ratio method using  $[4-^{14}\text{C}]$  cholesterol and  $[5,6-^3\text{H}]$  sitostanol as previously described(14). Non-fasted mice were dosed with 0.5 $\mu\text{Ci}$  of  $^{14}\text{C}$ -labeled cholesterol and 1 $\mu\text{Ci}$  of  $^3\text{H}$ -labeled sitostanol in corn oil. Feces were collected for 48 hours after dosing, and the ratio of  $^{14}\text{C}$  to  $^3\text{H}$  in aliquots of samples was used to calculate the percent cholesterol absorption.

#### ***Measurement of in vivo VLDL secretion rate***

*In vivo* VLDL secretion rates were estimated by using Triton WR1339 to inhibit lipoprotein lipolysis as described previously(15). Plasma levels of triglyceride were measured at 1, 2, 3, and 4 hours after intravenously injection of Triton WR 1339.

#### ***Measurement of <sup>125</sup>I-labeled Rabbit $\beta$ -VLDL kinetics***

Plasma lipoprotein kinetics were measured as previously described(16). In brief, mice were anesthetized with sodium pentobarbital and received an intravenous injection of 0.25 ml of 0.15 M NaCl containing bovine serum albumin (2 mg/ml) and 10  $\mu$ g of <sup>125</sup>I-labeled rabbit  $\beta$ -VLDL (293 cpm/ng protein). Blood was collected at the indicated time by retro-orbital puncture. The plasma content of <sup>125</sup>I-labeled apoB was measured by isopropanol precipitation followed by gamma counting.

#### ***Histology***

Liver slices were stained with Hematoxylin and eosin (H&E), oil red O and TdT-mediated dUTP-nick end labeling (TUNEL), Immunostaining was performed for Ki-67(7).

#### ***Other assays***

Caspase-3 activity were determined as described previously(7).

#### ***Statistics***

Statistical analyses were performed using the Student's *t* test (2-tailed) or two-way repeated-measures ANOVA as described in Table and figure legends.

### **Supplemental table and figure legends**

#### **Supplemental table 1. Primer and probe sequences for quantitative real-time PCR.**

#### **Supplemental table 2. Plasma lipids and ALT levels in female mice.**

Blood samples were taken from male mice fed a normal chow diet ad libitum or fasted for 16 hours before the study. Each value represents the mean  $\pm$  SD. \* $p < 0.05$  vs. fSS mice with the same age by Student's *t* test.

#### **Supplemental figure 1. Targeting strategy to disrupt the SS gene in mice.**

The sequences between *loxP* sites exon 5 are designed to be deleted by Cre-recombinase. The location of the probe used for Southern blot and Northern blot analysis is denoted by the horizontally filled.

#### **Supplemental figure 2. Deletion of SS gene in the livers and intestinal cholesterol absorption.**

(A) Southern blot analysis. Genomic DNA was prepared from the livers of WT, fSS and L-SSKO male mice at the ages of 4 weeks. (B) Northern blot. Total RNA was prepared from the livers of



control and L-SSKO male at the ages of 12 weeks. (C) Cholesterol absorption was determined in the male mice at the age of 12 weeks (fSS, n = 4; L-SSKO, n = 5). Each value represents the mean  $\pm$  SD.

### **Supplemental figure 3. Synthesis and hepatocellular toxicity of farnesol.**

**A)** Time course of synthetic rate of farnesol from  $^{14}\text{C}$ -acetate in the whole liver slices (n = 5 in each group). Each value represents the mean  $\pm$  SD. \* $p < 0.05$  by Student's *t* test. **(B)**

Hepatocellular toxicity of increasing concentrations of farnesol. Primary hepatocytes were prepared from C57BL/6J mice (n = 3), seeded onto collagen-coated 96-well plate at a density of  $1.8 \times 10^4$  cells per well and cultured. The cells were treated with various concentrations of trans,trans-farnesol (Sigma) for 7 days. Values are mean  $\pm$  SD of triplicates for each treatment.

Cytotoxicity was determined by MTT assay kit (Promega) according to the manufacturer's instructions. \*\* $p < 0.001$  vs 0  $\mu\text{M}$  of farnesol by Student's *t* test. **(C)** Effects of feeding with high fat high sucrose diet (HFHSD) on plasma ALT levels. At 12 weeks of age, mice were fed HFHSD (60% kcal in fat, 20% kcal in carbohydrate and 20% kcal in protein; #D12492, Research Diets) which is known to induce hepatic steatosis and dysfunction. Plasma ALT levels were measured before and 12 weeks after the feeding in fSS and L-SSKO male mice (fSS, n = 9; L-SSKO, n = 5). Each value represents the mean  $\pm$  SD. \* $p < 0.05$  by Student's *t* test.

#### **Supplemental figure 4. Hepatic contents of regulatory oxysterols.**

The tissue lysates from the livers of male mice at the age of 12 weeks (n = 5 in each group) were used for measurements of oxysterols. Each value represents the mean  $\pm$  SD. \* $p < 0.05$  Student's *t* test.

#### **Supplemental figure 5. Schematic view of hepatic cholesterol metabolism in L-SSKO mice.**

In parentheses, upward-facing arrows, increased; downward-facing arrows decreased; right-facing arrows, unchanged. ApoB indicates apolipoprotein B; CideB, cell death-inducing DNA fragmentation factor 45-like effector B; FPP, farnesyl diphosphate; FPPS, FPP synthase; GGPP, geranyl geranyl diphosphate; HMGCR, HMG-CoA reductase; LDLR, LDL receptor; LXR, liver x receptor. MTTP, microsomal triglyceride transfer protein; SQLE, squalene epoxidase; SREBP-1c, sterol regulatory element-binding protein 1c; SS, squalene synthase.

## References

1. Saher, G., B. Brugger, C. Lappe-Siefke, W. Mobius, R. Tozawa, M. C. Wehr, F. Wieland, S. Ishibashi, and K. A. Nave. 2005. High cholesterol level is essential for myelin membrane growth. *Nature neuroscience* **8**: 468-475.
2. Yakar, S., J. L. Liu, B. Stannard, A. Butler, D. Accili, B. Sauer, and D. LeRoith. 1999. Normal growth and development in the absence of hepatic insulin-like growth factor I. *Proceedings of the National Academy of Sciences of the United States of America* **96**: 7324-7329.
3. Hwa, J. J., S. Zollman, C. H. Warden, B. A. Taylor, P. A. Edwards, A. M. Fogelman, and A. J. Lusis. 1992. Genetic and dietary interactions in the regulation of HMG-CoA reductase gene expression. *Journal of lipid research* **33**: 711-725.
4. Engelking, L. J., H. Kuriyama, R. E. Hammer, J. D. Horton, M. S. Brown, J. L. Goldstein, and G. Liang. 2004. Overexpression of Insig-1 in the livers of transgenic mice inhibits SREBP processing and reduces insulin-stimulated lipogenesis. *J Clin Invest* **113**: 1168-1175.

5. Sato, R., J. L. Goldstein, and M. S. Brown. 1993. Replacement of serine-871 of hamster 3-hydroxy-3-methylglutaryl-CoA reductase prevents phosphorylation by AMP-activated kinase and blocks inhibition of sterol synthesis induced by ATP depletion. *Proceedings of the National Academy of Sciences of the United States of America* **90**: 9261-9265.
6. Tozawa, R., S. Ishibashi, J. Osuga, H. Yagyu, T. Oka, Z. Chen, K. Ohashi, S. Perrey, F. Shionoiri, N. Yahagi, K. Harada, T. Gotoda, Y. Yazaki, and N. Yamada. 1999. Embryonic lethality and defective neural tube closure in mice lacking squalene synthase. *The Journal of biological chemistry* **274**: 30843-30848.
7. Nagashima, S., H. Yagyu, K. Ohashi, F. Tazoe, M. Takahashi, T. Ohshiro, T. Bayasgalan, K. Okada, M. Sekiya, J. Osuga, and S. Ishibashi. 2012. Liver-specific deletion of 3-hydroxy-3-methylglutaryl coenzyme a reductase causes hepatic steatosis and death. *Arteriosclerosis, thrombosis, and vascular biology* **32**: 1824-1831.
8. Olson, R. J., T. E. Trumble, and W. Gamble. 1974. Alterations in cholesterol and fatty acid biosynthesis in rat liver homogenates by aryloxy acids. *Biochem J* **142**: 445-448.

9. Matsuoka, T., S. Ueda, H. Matsumoto, and M. Kawakami. 2012. An ultrasensitive enzymatic method for measuring mevalonic acid in serum. *Journal of lipid research* **53**: 1987-1992.
10. Takami, T., Y. Fang, X. Zhou, W. Jaiseng, Y. Ma, and T. Kuno. 2012. A genetic and pharmacological analysis of isoprenoid pathway by LC-MS/MS in fission yeast. *PLoS one* **7**: e49004.
11. Honda, A., T. Miyazaki, T. Ikegami, J. Iwamoto, K. Yamashita, M. Numazawa, and Y. Matsuzaki. 2010. Highly sensitive and specific analysis of sterol profiles in biological samples by HPLC-ESI-MS/MS. *The Journal of steroid biochemistry and molecular biology* **121**: 556-564.
12. Mercer, N. J., and B. J. Holub. 1981. Measurement of hepatic sterol synthesis in the Mongolian gerbil in vivo using [<sup>3</sup>H]water: diurnal variation and effect of type of dietary fat. *Journal of lipid research* **22**: 792-799.
13. Lowenstein, J. M., H. Brunengraber, and M. Wadke. 1975. Measurement of rates of lipogenesis with deuterated and tritiated water. *Methods in enzymology* **35**: 279-287.

14. Ohshiro, T., D. Matsuda, K. Sakai, C. Degirolamo, H. Yagyu, L. L. Rudel, S. Omura, S. Ishibashi, and H. Tomoda. 2011. Pyripyropene A, an acyl-coenzyme A:cholesterol acyltransferase 2-selective inhibitor, attenuates hypercholesterolemia and atherosclerosis in murine models of hyperlipidemia. *Arteriosclerosis, thrombosis, and vascular biology* **31**: 1108-1115.
15. Okazaki, H., F. Tazoe, S. Okazaki, N. Isoo, K. Tsukamoto, M. Sekiya, N. Yahagi, Y. Iizuka, K. Ohashi, T. Kitamine, R. Tozawa, T. Inaba, H. Yagyu, M. Okazaki, H. Shimano, N. Shibata, H. Arai, R. Z. Nagai, T. Kadowaki, J. Osuga, and S. Ishibashi. 2006. Increased cholesterol biosynthesis and hypercholesterolemia in mice overexpressing squalene synthase in the liver. *Journal of lipid research* **47**: 1950-1958.
16. Ishibashi, S., M. S. Brown, J. L. Goldstein, R. D. Gerard, R. E. Hammer, and J. Herz. 1993. Hypercholesterolemia in low density lipoprotein receptor knockout mice and its reversal by adenovirus-mediated gene delivery. *J Clin Invest* **92**: 883-893.

# Supplemental table 1

| gene          | Forward primer                                                                              | Reverse primer            | Probe                    |
|---------------|---------------------------------------------------------------------------------------------|---------------------------|--------------------------|
| SS            | CCAACCTCAATGGGTCTGTTCCCT                                                                    | TGGCTTAGCAAAGTCTTCCAACCT  | CAGAAAACAAATATCATTCG     |
| SREBP2        | CCGGTCTCTCCATCAACGA                                                                         | TGGCATCTGTCCCCATGACT      | AAAATCATAGAGTTGAAGGACT   |
| SREBP-1a      | GGCCGAGATGTGCGAACT                                                                          | TTGTTGATGAGCTGGAGCATGT    | AGCGGTTTTGAACGACAT       |
| SREBP-1c      | TGGATTGCACATTTGAAGACATG                                                                     | GGCCCCGGAAGTCACTGT        | CAGCTCATCAACAACCA        |
| LDLR          | AGGCTGTGGGCTCCATAGG                                                                         | TGCGGTCCAGGGTCATCT        | TATCTGCTCTTCCACCAACC     |
| PCSK9         | TTGCAGCAGCTGGGAACCT                                                                         | CCGACTGTGATGACCTCTGGA     | ACGACGCCTGCCTCTACTCCCCAG |
| LRP1          | AACTTGACGCCCTAAGCAGTT                                                                       | GCAATCTCTTTCACCGTCACA     | CCAAATCACCTGTATCTCA      |
| SR-BI         | TCCCTCATCAAGCAGCAGGT                                                                        | TCCACATCCCGAAGGACA        | TCAAGAATGTCCGCATAGA      |
| HMGR          | CGTCATTCAATTTCTCGACAAA                                                                      | AGCAGAAAAAAGGGCAAAGCT     | AACTGACAGGCTTAAAT        |
| FPPS          | ATGGAGATGGGCGAGTTCTTC                                                                       | CCGACCTTTCCCGTCACA        | CTACCTTGATCTCTTTGGAG     |
| SQLE          | GGCTCAGCCTTGATGAATTATT                                                                      | GCTTTTCGGAGCTGATGCA       | TCAGCTACAGATGATTCC       |
| FAS           | GCTGCGGAAACTTCAGGAAAT                                                                       | AGAGACGTGTCACTCCTGGACTT   | ACTCGGCTACTGACACGA       |
| MTP           | GCTCCCTCAGCTGGTGGAT                                                                         | CAGGATGGCTTCTAGCGAGTCT    | ACCTCTGCTCAGACTC         |
| ApoB          | CGTGGGCTCCAGCATTCTA                                                                         | TCACCAGTCATTTCTGCCTTTG    | CCAATGGTCGGGCAC          |
| CideB         | Taqman® Gene Expression Assays (Assay ID: Mm00438213_m1) purchased from Applied Biosystems. |                           |                          |
| ABCA1         | TGCCACTTTCCGAATAAAGC                                                                        | GGAGTTGGATAACGGAAGCA      | ATGCCGTCTGCAGGAA         |
| LXR- $\alpha$ | GCTCTGCTCATTGCCATCAG                                                                        | TGTTGCAGCCTCTCTACTTGGA    | CTGCAGACCGGCCCA          |
| CYP7A1        | AGCAACTAAACAACCTGCCAGTACTA                                                                  | GTCCGGATATTCAAGGATGCA     | CATCAAGGAGGCTCTG         |
| ABCG5         | TGGCCCTGCTCAGCATCT                                                                          | ATTTTTAAAGGAATGGGCATCTCTT | CTGCTTATTGGATCTGGATT     |
| ABCG8         | CCGTGCTCAGATTTCCAATGA                                                                       | GGCTTCCGACCCATGAATG       | TTCCGGGACCTGCCCA         |
| $\beta$ actin | CGATGCCCTGAGGCTCTTT                                                                         | TGGATGCCACAGGATTCCA       | CCAGCTTCTCTTCTT          |
| GAPDH         | Taqman® Gene Expression Assays (Assay ID: Mm99999915_g1) purchased from Applied Biosystems. |                           |                          |

**Supplemental table 2**

| Age (weeks)                      | 12             |                  |
|----------------------------------|----------------|------------------|
| Genotype                         | fSS            | L-SSKO           |
| Plasma total cholesterol (mg/dl) |                |                  |
| fed                              | 69.5±7.4 (11)  | 55.0±14.9 (11) * |
| 16 hour-fasted                   | 83.7±14.9 (6)  | 78.1±6.4 (5)     |
| Plasma triglyceride (mg/dl)      |                |                  |
| fed                              | 62.9±34.4 (11) | 35.9±16.9 (7) *  |
| 16 hour-fasted                   | 70.2±26.0 (6)  | 50.8±7.8 (5) *   |
| Plasma free fatty acid (mmol/l)  |                |                  |
| fed                              | 0.44±0.10 (11) | 0.41±0.12 (11)   |
| 16 hour-fasted                   | 1.93±0.17 (6)  | 1.76±0.14 (5)    |
| Plasma ALT (IU/l)                | 10.3±3.2 (11)  | 46.7±70.2 (11) * |



# Supplemental figure 1

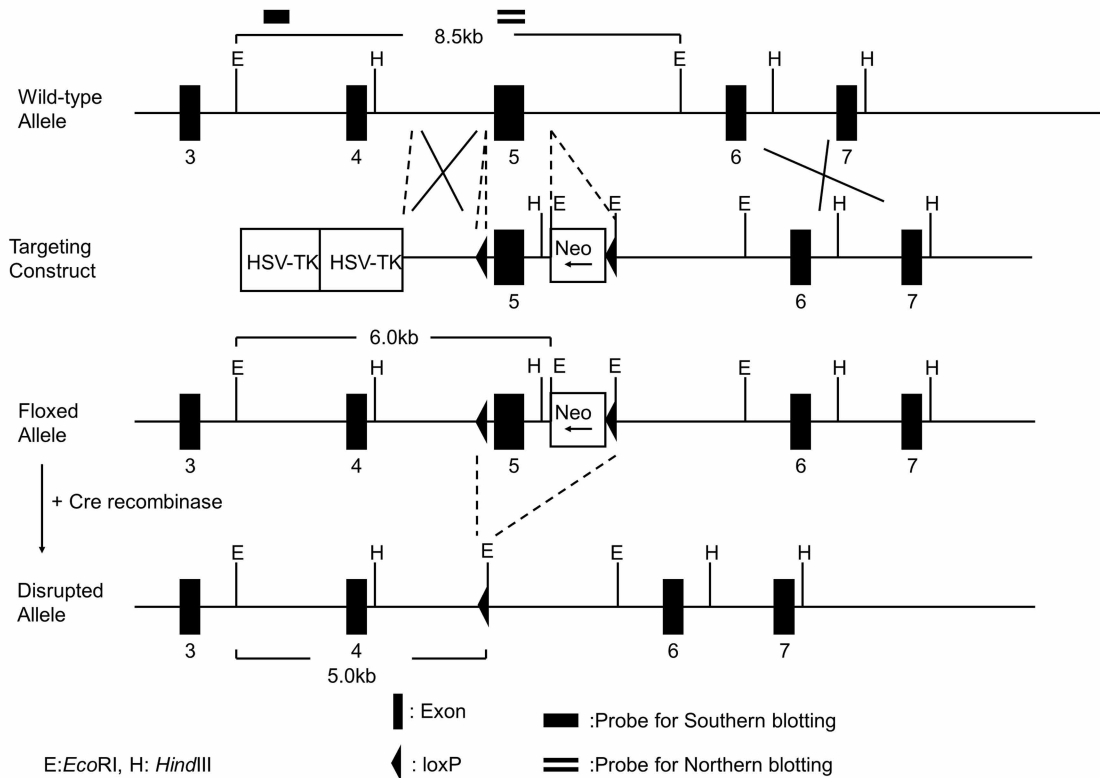

# Supplemental figure 2

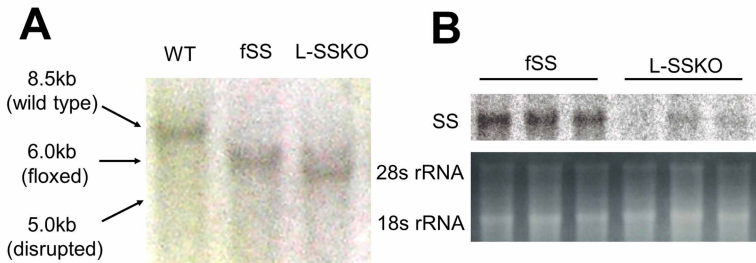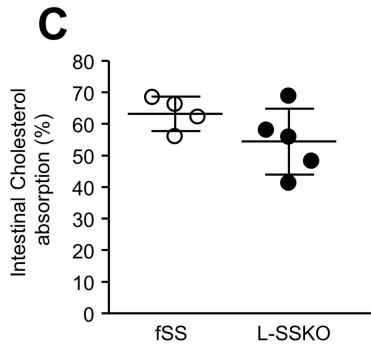

# Supplemental figure 3

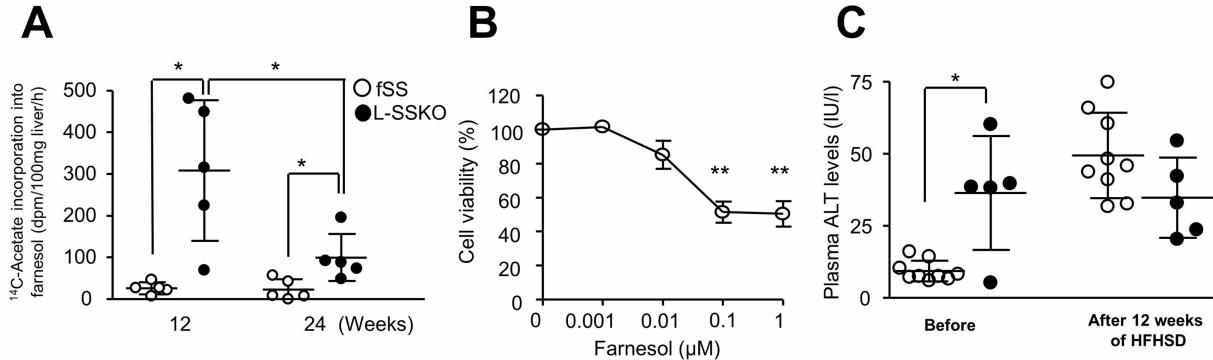

# Supplemental figure 4

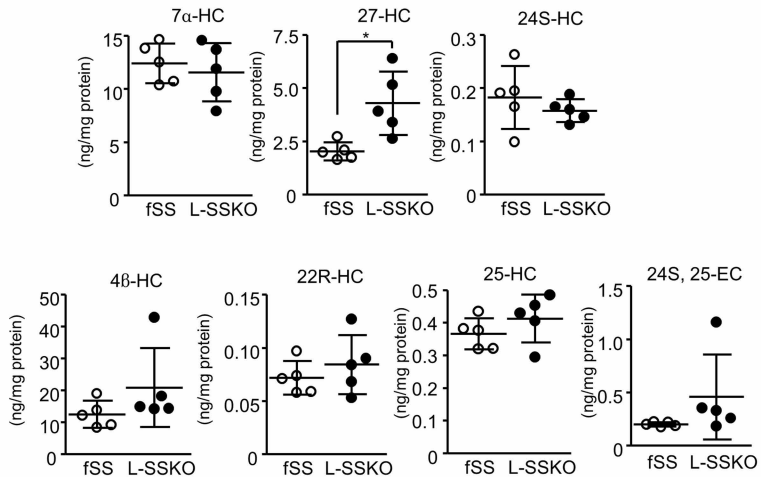

# Supplemental figure 5

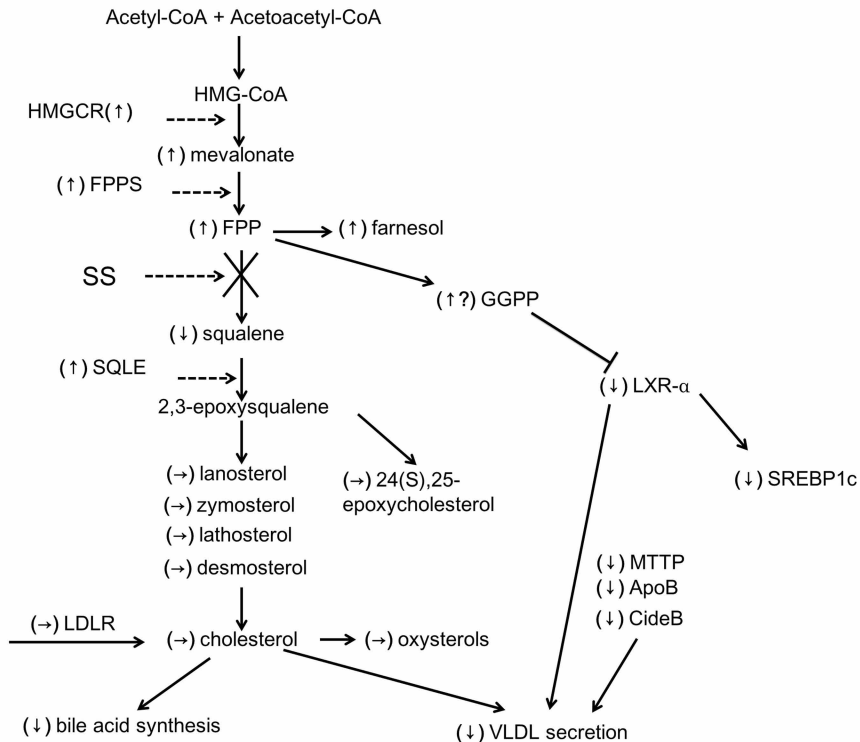

Supplement: supp_M057406_jlr.M057406-1.pdf [file supp_M057406_jlr.M057406-1.pdf]
